# Supplementary material for: 2019-2023 trends in indicators for the prevention of mother-to-child transmission of HIV in Cameroon: reflections for the path to elimination by 2030
Source: Research Square preprint supplement (doi:10.21203/rs.3.rs-7710306/v1), 2025-11-28
Supplement: Supplementary file 1 [file bdd4375d7f72db87b2b3e46b.xlsx]

## Sheet: Database
REGION	Year	Pregnant women expected	Pregnant women received (ANC+WA)	ANC coverage	Pregnant women tested for HIV	Screening rate	HIV-positive pregnant women	Positivity rate	HIV-positive pregnant women initiated on ART	ARV coverage	HIV-exposed infants born to HIV+ Women	HIV-exposed infants started on NVP	NVP coverage among HIV-exposed infants	HIV-exposed infants tested for HIV	HIV testing rate among HIV-exposed infants	HIV-positive HIV-exposed infants	HIV positivity rate among HIV-exposed infants	HIV-exposed infants initiated on ART	ARV coverage among HIV-positive HIV-exposed infants
Adamaoua	2023	62535	60736	97.1232	59496	97.9584	1281	2.15309	1266	98.829	1022	1008	98.6301	1009	98.728	56	5.55005	44	78.5714
Adamaoua	2022	63106	62873	99.6308	62387	99.227	1310	2.0998	1307	99.771	981	953	97.1458	947	96.5341	56	5.91341	50	89.2857
Adamaoua	2021	62907	64444	102.443	63078	97.8803	1525	2.41764	1498	98.2295	964	940	97.5104	784	81.3278	31	3.95408	24	77.4194
Adamaoua	2020	55183	57148	103.561	55382	96.9098	1408	2.54234	1393	98.9347	963	917	95.2233	840	87.2274	28	3.33333	36	128.571
Adamaoua	2019	54267	51987	95.7986	44371	85.3502	1225	2.76081	1217	99.3469	940	935	99.4681	805	85.6383	22	2.73292	19	86.3636
East	2023	51099	59487	116.415	57950	97.4162	1806	3.11648	1702	94.2414	1244	1209	97.1865	927	74.5177	26	2.80475	21	80.7692
East	2022	49951	66759	133.649	64717	96.9412	1998	3.08729	1805	90.3403	1253	1146	91.4605	1060	84.597	52	4.90566	42	80.7692
East	2021	48801	66440	136.145	63866	96.1258	2274	3.56058	1932	84.9604	1213	1124	92.6628	1024	84.4188	62	6.05469	57	91.9355
East	2020	40144	57608	143.503	54104	93.9175	2515	4.64845	1843	73.2803	1121	850	75.8252	847	75.5575	75	8.85478	34	45.3333
East	2019	40196	51998	129.361	45074	86.6841	2091	4.63904	1566	74.8924	1331	871	65.4395	636	47.7836	38	5.97484	16	42.1053
Center	2023	152917	143789	94.0307	136225	94.7395	4186	3.07286	3158	75.4419	3168	2831	89.3624	2845	89.8043	122	4.28822	79	64.7541
Center	2022	156770	147069	93.812	140041	95.2213	4787	3.41828	3742	78.17	3245	2909	89.6456	3463	106.718	120	3.4652	77	64.1667
Center	2021	153793	147877	96.1533	140150	94.7747	4961	3.53978	4270	86.0714	3456	3053	88.3391	3274	94.7338	140	4.27611	78	55.7143
Center	2020	138647	136556	98.4919	126779	92.8403	5448	4.29724	4053	74.3943	3707	3054	82.3847	3521	94.9825	122	3.46492	72	59.0164
Center	2019	143348	131222	91.5409	122549	93.3906	5104	4.16486	4581	89.7531	3826	3475	90.8259	4558	119.132	239	5.24353	103	43.0962
Far North	2023	250651	178535	71.2285	170340	95.4099	927	0.544206	872	94.0669	656	592	90.2439	721	109.909	39	5.40915	32	82.0513
Far North	2022	243114	183555	75.5016	174992	95.3349	1175	0.671459	1108	94.2979	727	662	91.0591	644	88.5832	47	7.29814	44	93.617
Far North	2021	236616	179214	75.7404	160056	89.31	1064	0.664767	940	88.3459	677	553	81.6839	492	72.6736	37	7.52033	31	83.7838
Far North	2020	231577	158838	68.5897	121090	76.2349	1190	0.98274	993	83.4454	651	507	77.8802	553	84.9462	17	3.07414	26	152.941
Far North	2019	218892	149500	68.2985	92750	62.0401	1124	1.21186	856	76.1566	724	538	74.3094	394	54.4199	36	9.13706	14	38.8889
Littoral	2023	119154	100458	84.3094	95498	95.0626	2329	2.43879	2271	97.5097	2343	2334	99.6159	2263	96.5856	63	2.78392	57	90.4762
Littoral	2022	116634	104421	89.5288	99242	95.0403	2703	2.72365	2601	96.2264	2299	2243	97.5642	2280	99.1736	55	2.41228	53	96.3636
Littoral	2021	114075	108441	95.0611	102878	94.87	3155	3.06674	2885	91.4422	2507	2360	94.1364	1753	69.9242	59	3.36566	46	77.9661
Littoral	2020	101014	95539	94.58	90391	94.6116	3718	4.11324	2835	76.2507	2586	2275	87.9737	2070	80.0464	136	6.57005	60	44.1176
Littoral	2019	102697	104662	101.913	95605	91.3464	4221	4.41504	3074	72.8263	3044	2538	83.3771	3443	113.108	214	6.21551	67	31.3084
North	2023	145279	108650	74.7871	107307	98.7639	1027	0.957067	993	96.6894	785	727	92.6115	766	97.5796	32	4.17755	24	75
North	2022	140775	116043	82.4315	113619	97.9111	1195	1.05176	1145	95.8159	753	696	92.4303	741	98.4064	47	6.34278	34	72.3404
North	2021	136152	125098	91.8811	117325	93.7865	1245	1.06115	1161	93.253	722	627	86.8421	761	105.402	71	9.32983	42	59.1549
North	2020	133415	116983	87.6835	99751	85.2697	1093	1.09573	996	91.1253	714	542	75.9104	1018	142.577	82	8.05501	12	14.6341
North	2019	129817	101150	77.9174	68421	67.6431	1002	1.46446	937	93.513	800	646	80.75	795	99.375	36	4.5283	14	38.8889
West	2023	98139	77659	79.1316	76627	98.6711	1102	1.43814	1059	96.098	1107	1080	97.561	1235	111.563	13	1.05263	11	84.6154
West	2022	97071	74800	77.057	74624	99.7647	1254	1.68042	1237	98.6443	1230	1215	98.7805	1360	110.569	21	1.54412	16	76.1905
West	2021	95798	79466	82.9516	78900	99.2877	1394	1.76679	1345	96.4849	1284	1179	91.8224	1240	96.5732	21	1.69355	22	104.762
West	2020	86648	72240	83.3718	71723	99.2843	1508	2.10253	1447	95.9549	1270	1170	92.126	1631	128.425	31	1.90067	32	103.226
West	2019	85983	65649	76.3511	63084	96.0929	1571	2.49033	1477	94.0165	1390	1295	93.1655	1213	87.2662	31	2.55565	16	51.6129
North West	2023	66170	37657	56.9095	36742	97.5702	985	2.68086	950	96.4467	1130	1111	98.3186	1180	104.425	23	1.94915	21	91.3043
North West	2022	65386	41164	62.9554	41080	99.7959	1233	3.00146	1189	96.4315	1317	1299	98.6333	1105	83.9028	29	2.62443	26	89.6552
North West	2021	64552	42169	65.3256	42136	99.9217	1318	3.12797	1285	97.4962	1290	1265	98.062	1230	95.3488	28	2.27642	25	89.2857
North West	2020	74062	39889	53.8589	39644	99.3858	1699	4.28564	1328	78.1636	1409	1265	89.78	1669	118.453	39	2.33673	39	100
North West	2019	77623	37619	48.4637	36285	96.4539	1522	4.19457	1468	96.452	1507	1412	93.6961	1629	108.096	48	2.94659	46	95.8333
South	2023	30537	27138	88.8692	26638	98.1576	845	3.17216	833	98.5799	664	643	96.8373	763	114.91	13	1.7038	11	84.6154
South	2022	29105	23732	81.5393	23655	99.6755	911	3.85119	898	98.573	742	728	98.1132	868	116.981	28	3.22581	27	96.4286
South	2021	28647	21182	73.9414	21025	99.2588	923	4.39001	905	98.0498	661	647	97.882	683	103.328	16	2.34261	16	100
South	2020	25364	20182	79.5695	19894	98.573	868	4.36312	825	95.0461	689	656	95.2104	636	92.3077	18	2.83019	14	77.7778
South	2019	25793	18875	73.1788	18191	96.3762	886	4.87054	855	96.5011	691	637	92.1852	609	88.1331	24	3.94089	11	45.8333
South West	2023	64785	32006	49.4034	31323	97.866	890	2.84136	795	89.3258	838	755	90.0955	829	98.926	29	3.49819	26	89.6552
South West	2022	63515	32983	51.9295	32922	99.8151	1021	3.10127	918	89.9119	871	807	92.6521	864	99.1963	20	2.31481	13	65
South West	2021	61831	34982	56.5768	34829	99.5626	1222	3.50857	1083	88.6252	1033	885	85.6728	919	88.9642	17	1.84984	9	52.9412
South West	2020	57743	30270	52.4219	30258	99.9604	1405	4.6434	1018	72.4555	1027	805	78.3836	992	96.592	43	4.33468	43	100
South West	2019	60439	24499	40.5351	23831	97.2734	1422	5.96702	1015	71.3783	942	903	95.8599	888	94.2675	36	4.05405	28	77.7778

## Sheet: Desc_HID
1	#NAME?	#NAME?
2	#NAME?	#NAME?
3	#NAME?	#NAME?
4	#NAME?	#NAME?
5	#NAME?	#NAME?
6	#NAME?	#NAME?
7	#NAME?	#NAME?
8	#NAME?	#NAME?
9	#NAME?	#NAME?
10	#NAME?	#NAME?
11	#NAME?	#NAME?
12	#NAME?	#NAME?
13	#NAME?	#NAME?
14	#NAME?	#NAME?
15	#NAME?	#NAME?
16	#NAME?	#NAME?
17	#NAME?	#NAME?
18	#NAME?	#NAME?
19	#NAME?	#NAME?
20	#NAME?	#NAME?
21	#NAME?	#NAME?
22	#NAME?	#NAME?
23	#NAME?	#NAME?
24	#NAME?	#NAME?
25	#NAME?	#NAME?
26	#NAME?	#NAME?
27	#NAME?	#NAME?
28	#NAME?	#NAME?
29	#NAME?	#NAME?
30	#NAME?	#NAME?
31	#NAME?	#NAME?
32	#NAME?	#NAME?
33	#NAME?	#NAME?
34	#NAME?	#NAME?
35	#NAME?	#NAME?
36	#NAME?	#NAME?
37	#NAME?	#NAME?
38	#NAME?	#NAME?
39	#NAME?	#NAME?
40	#NAME?	#NAME?
41	#NAME?	#NAME?
42	#NAME?	#NAME?
43	#NAME?	#NAME?
44	#NAME?	#NAME?
45	#NAME?	#NAME?
46	#NAME?	#NAME?
47	#NAME?	#NAME?
48	#NAME?	#NAME?
49	#NAME?	#NAME?
50	#NAME?	#NAME?
51	#NAME?	#NAME?
52	#NAME?	#NAME?
53	#NAME?	#NAME?
54	#NAME?	#NAME?
55	#NAME?	#NAME?
56	#NAME?	#NAME?
57	#NAME?	#NAME?
58	#NAME?	#NAME?
59	#NAME?	#NAME?
60	#NAME?	#NAME?
61	#NAME?	#NAME?
62	#NAME?	#NAME?
63	#NAME?	#NAME?
64	#NAME?	#NAME?
65	#NAME?	#NAME?
66	#NAME?	#NAME?
67	#NAME?	#NAME?
68	#NAME?	#NAME?
69	#NAME?	#NAME?
70	#NAME?	#NAME?
71	#NAME?	#NAME?
72	#NAME?	#NAME?
73	#NAME?	#NAME?
74	#NAME?	#NAME?
75	#NAME?	#NAME?
76	#NAME?	#NAME?
77	#NAME?	#NAME?
78	#NAME?	#NAME?
79	#NAME?	#NAME?
80	#NAME?	#NAME?
81	#NAME?	#NAME?
82	#NAME?	#NAME?
83	#NAME?	#NAME?
84	#NAME?	#NAME?
85	#NAME?	#NAME?
86	#NAME?	#NAME?
87	#NAME?	#NAME?
88	#NAME?	#NAME?
89	#NAME?	#NAME?
90	#NAME?	#NAME?
91	#NAME?	#NAME?
92	#NAME?	#NAME?
93	#NAME?	#NAME?
94	#NAME?	#NAME?
95	#NAME?	#NAME?
96	#NAME?	#NAME?
97	#NAME?	#NAME?
98	#NAME?	#NAME?
99	#NAME?	#NAME?
100	#NAME?	#NAME?
101	#NAME?	#NAME?
102	#NAME?	#NAME?
103	#NAME?	#NAME?
104	#NAME?	#NAME?
105	#NAME?	#NAME?
106	#NAME?	#NAME?
107	#NAME?	#NAME?
108	#NAME?	#NAME?
109	#NAME?	#NAME?
110	#NAME?	#NAME?
111	#NAME?	#NAME?
112	#NAME?	#NAME?
113	#NAME?	#NAME?
114	#NAME?	#NAME?
115	#NAME?	#NAME?
116	#NAME?	#NAME?
117	#NAME?	#NAME?
118	#NAME?	#NAME?
119	#NAME?	#NAME?
120	#NAME?	#NAME?
121	#NAME?	#NAME?
122	#NAME?	#NAME?
123	#NAME?	#NAME?
124	#NAME?	#NAME?
125	#NAME?	#NAME?
126	#NAME?	#NAME?
127	#NAME?	#NAME?
128	#NAME?	#NAME?
129	#NAME?	#NAME?
130	#NAME?	#NAME?
131	#NAME?	#NAME?
132	#NAME?	#NAME?
133	#NAME?	#NAME?
134	#NAME?	#NAME?
135	#NAME?	#NAME?
136	#NAME?	#NAME?
137	#NAME?	#NAME?
138	#NAME?	#NAME?
139	#NAME?	#NAME?
140	#NAME?	#NAME?
141	#NAME?	#NAME?
142	#NAME?	#NAME?
143	#NAME?	#NAME?
144	#NAME?	#NAME?
145	#NAME?	#NAME?
146	#NAME?	#NAME?
147	#NAME?	#NAME?
148	#NAME?	#NAME?
149	#NAME?	#NAME?
150	#NAME?	#NAME?
151	#NAME?	#NAME?
152	#NAME?	#NAME?
153	#NAME?	#NAME?
154	#NAME?	#NAME?
155	#NAME?	#NAME?
156	#NAME?	#NAME?
157	#NAME?	#NAME?
158	#NAME?	#NAME?
159	#NAME?	#NAME?
160	#NAME?	#NAME?
161	#NAME?	#NAME?
162	#NAME?	#NAME?
163	#NAME?	#NAME?
164	#NAME?	#NAME?
165	#NAME?	#NAME?
166	#NAME?	#NAME?
167	#NAME?	#NAME?
168	#NAME?	#NAME?
169	#NAME?	#NAME?
170	#NAME?	#NAME?
171	#NAME?	#NAME?
172	#NAME?	#NAME?
173	#NAME?	#NAME?
174	#NAME?	#NAME?
175	#NAME?	#NAME?
176	#NAME?	#NAME?
177	#NAME?	#NAME?
178	#NAME?	#NAME?
179	#NAME?	#NAME?
180	#NAME?	#NAME?
181	#NAME?	#NAME?
182	#NAME?	#NAME?
183	#NAME?	#NAME?
184	#NAME?	#NAME?
185	#NAME?	#NAME?
186	#NAME?	#NAME?
187	#NAME?	#NAME?
188	#NAME?	#NAME?
189	#NAME?	#NAME?
190	#NAME?	#NAME?
191	#NAME?	#NAME?
192	#NAME?	#NAME?
193	#NAME?	#NAME?
194	#NAME?	#NAME?
195	#NAME?	#NAME?
196	#NAME?	#NAME?
197	#NAME?	#NAME?
198	#NAME?	#NAME?
199	#NAME?	#NAME?
200	#NAME?	#NAME?
201	#NAME?	#NAME?
202	#NAME?	#NAME?
203	#NAME?	#NAME?
204	#NAME?	#NAME?
205	#NAME?	#NAME?
206	#NAME?	#NAME?
207	#NAME?	#NAME?
208	#NAME?	#NAME?
209	#NAME?	#NAME?
210	#NAME?	#NAME?
211	#NAME?	#NAME?
212	#NAME?	#NAME?
213	#NAME?	#NAME?
214	#NAME?	#NAME?
215	#NAME?	#NAME?
216	#NAME?	#NAME?
217	#NAME?	#NAME?
218	#NAME?	#NAME?
219	#NAME?	#NAME?
220	#NAME?	#NAME?
221	#NAME?	#NAME?
222	#NAME?	#NAME?
223	#NAME?	#NAME?
224	#NAME?	#NAME?
225	#NAME?	#NAME?
226	#NAME?	#NAME?
227	#NAME?	#NAME?
228	#NAME?	#NAME?
229	#NAME?	#NAME?
230	#NAME?	#NAME?
231	#NAME?	#NAME?
232	#NAME?	#NAME?
233	#NAME?	#NAME?
234	#NAME?	#NAME?
235	#NAME?	#NAME?
236	#NAME?	#NAME?
237	#NAME?	#NAME?
238	#NAME?	#NAME?
239	#NAME?	#NAME?
240	#NAME?	#NAME?
241	#NAME?	#NAME?
242	#NAME?	#NAME?
243	#NAME?	#NAME?
244	#NAME?	#NAME?
245	#NAME?	#NAME?
246	#NAME?	#NAME?
247	#NAME?	#NAME?
248	#NAME?	#NAME?
249	#NAME?	#NAME?
250	#NAME?	#NAME?
251	#NAME?	#NAME?
252	#NAME?	#NAME?
253	#NAME?	#NAME?
254	#NAME?	#NAME?
255	#NAME?	#NAME?
256	#NAME?	#NAME?
257	#NAME?	#NAME?
258	#NAME?	#NAME?
259	#NAME?	#NAME?
260	#NAME?	#NAME?
261	#NAME?	#NAME?
262	#NAME?	#NAME?
263	#NAME?	#NAME?
264	#NAME?	#NAME?
265	#NAME?	#NAME?
266	#NAME?	#NAME?
267	#NAME?	#NAME?
268	#NAME?	#NAME?
269	#NAME?	#NAME?
270	#NAME?	#NAME?
271	#NAME?	#NAME?
272	#NAME?	#NAME?
273	#NAME?	#NAME?
274	#NAME?	#NAME?
275	#NAME?	#NAME?
276	#NAME?	#NAME?
277	#NAME?	#NAME?
278	#NAME?	#NAME?
279	#NAME?	#NAME?
280	#NAME?	#NAME?
281	#NAME?	#NAME?
282	#NAME?	#NAME?
283	#NAME?	#NAME?
284	#NAME?	#NAME?
285	#NAME?	#NAME?
286	#NAME?	#NAME?
287	#NAME?	#NAME?
288	#NAME?	#NAME?
289	#NAME?	#NAME?
290	#NAME?	#NAME?
291	#NAME?	#NAME?
292	#NAME?	#NAME?
293	#NAME?	#NAME?
294	#NAME?	#NAME?
295	#NAME?	#NAME?
296	#NAME?	#NAME?
297	#NAME?	#NAME?
298	#NAME?	#NAME?
299	#NAME?	#NAME?
300	#NAME?	#NAME?
301	#NAME?	#NAME?
302	#NAME?	#NAME?
303	#NAME?	#NAME?
304	#NAME?	#NAME?
305	#NAME?	#NAME?
306	#NAME?	#NAME?
307	#NAME?	#NAME?
308	#NAME?	#NAME?
309	#NAME?	#NAME?
310	#NAME?	#NAME?
311	#NAME?	#NAME?
312	#NAME?	#NAME?
313	#NAME?	#NAME?
314	#NAME?	#NAME?
315	#NAME?	#NAME?
316	#NAME?	#NAME?
317	#NAME?	#NAME?
318	#NAME?	#NAME?
319	#NAME?	#NAME?
320	#NAME?	#NAME?
321	#NAME?	#NAME?
322	#NAME?	#NAME?
323	#NAME?	#NAME?
324	#NAME?	#NAME?
325	#NAME?	#NAME?
326	#NAME?	#NAME?
327	#NAME?	#NAME?
328	#NAME?	#NAME?
329	#NAME?	#NAME?
330	#NAME?	#NAME?
331	#NAME?	#NAME?
332	#NAME?	#NAME?
333	#NAME?	#NAME?
334	#NAME?	#NAME?
335	#NAME?	#NAME?
336	#NAME?	#NAME?
337	#NAME?	#NAME?
338	#NAME?	#NAME?
339	#NAME?	#NAME?
340	#NAME?	#NAME?
341	#NAME?	#NAME?
342	#NAME?	#NAME?
343	#NAME?	#NAME?
344	#NAME?	#NAME?
345	#NAME?	#NAME?
346	#NAME?	#NAME?
347	#NAME?	#NAME?
348	#NAME?	#NAME?
349	#NAME?	#NAME?
350	#NAME?	#NAME?
351	#NAME?	#NAME?
352	#NAME?	#NAME?
353	#NAME?	#NAME?
354	#NAME?	#NAME?
355	#NAME?	#NAME?
356	#NAME?	#NAME?
357	#NAME?	#NAME?
358	#NAME?	#NAME?
359	#NAME?	#NAME?
360	#NAME?	#NAME?
361	#NAME?	#NAME?
362	#NAME?	#NAME?
363	#NAME?	#NAME?
364	#NAME?	#NAME?
365	#NAME?	#NAME?
366	#NAME?	#NAME?
367	#NAME?	#NAME?
368	#NAME?	#NAME?
369	#NAME?	#NAME?
370	#NAME?	#NAME?
371	#NAME?	#NAME?
372	#NAME?	#NAME?
373	#NAME?	#NAME?
374	#NAME?	#NAME?
375	#NAME?	#NAME?
376	#NAME?	#NAME?
377	#NAME?	#NAME?
378	#NAME?	#NAME?
379	#NAME?	#NAME?
380	#NAME?	#NAME?
381	#NAME?	#NAME?
382	#NAME?	#NAME?
383	#NAME?	#NAME?
384	#NAME?	#NAME?
385	#NAME?	#NAME?
386	#NAME?	#NAME?
387	#NAME?	#NAME?
388	#NAME?	#NAME?
389	#NAME?	#NAME?
390	#NAME?	#NAME?
391	#NAME?	#NAME?
392	#NAME?	#NAME?
393	#NAME?	#NAME?
394	#NAME?	#NAME?
395	#NAME?	#NAME?
396	#NAME?	#NAME?
397	#NAME?	#NAME?
398	#NAME?	#NAME?
399	#NAME?	#NAME?
400	#NAME?	#NAME?
401	#NAME?	#NAME?
402	#NAME?	#NAME?
403	#NAME?	#NAME?
404	#NAME?	#NAME?
405	#NAME?	#NAME?
406	#NAME?	#NAME?
407	#NAME?	#NAME?
408	#NAME?	#NAME?
409	#NAME?	#NAME?
410	#NAME?	#NAME?
411	#NAME?	#NAME?
412	#NAME?	#NAME?
413	#NAME?	#NAME?
414	#NAME?	#NAME?
415	#NAME?	#NAME?
416	#NAME?	#NAME?
417	#NAME?	#NAME?
418	#NAME?	#NAME?
419	#NAME?	#NAME?
420	#NAME?	#NAME?
421	#NAME?	#NAME?
422	#NAME?	#NAME?
423	#NAME?	#NAME?
424	#NAME?	#NAME?
425	#NAME?	#NAME?
426	#NAME?	#NAME?
427	#NAME?	#NAME?
428	#NAME?	#NAME?
429	#NAME?	#NAME?
430	#NAME?	#NAME?
431	#NAME?	#NAME?
432	#NAME?	#NAME?
433	#NAME?	#NAME?
434	#NAME?	#NAME?
435	#NAME?	#NAME?
436	#NAME?	#NAME?
437	#NAME?	#NAME?
438	#NAME?	#NAME?
439	#NAME?	#NAME?
440	#NAME?	#NAME?
441	#NAME?	#NAME?
442	#NAME?	#NAME?
443	#NAME?	#NAME?
444	#NAME?	#NAME?
445	#NAME?	#NAME?
446	#NAME?	#NAME?
447	#NAME?	#NAME?
448	#NAME?	#NAME?
449	#NAME?	#NAME?
450	#NAME?	#NAME?
451	#NAME?	#NAME?
452	#NAME?	#NAME?
453	#NAME?	#NAME?
454	#NAME?	#NAME?
455	#NAME?	#NAME?
456	#NAME?	#NAME?
457	#NAME?	#NAME?
458	#NAME?	#NAME?
459	#NAME?	#NAME?
460	#NAME?	#NAME?
461	#NAME?	#NAME?
462	#NAME?	#NAME?
463	#NAME?	#NAME?
464	#NAME?	#NAME?
465	#NAME?	#NAME?
466	#NAME?	#NAME?
467	#NAME?	#NAME?
468	#NAME?	#NAME?
469	#NAME?	#NAME?
470	#NAME?	#NAME?
471	#NAME?	#NAME?
472	#NAME?	#NAME?
473	#NAME?	#NAME?
474	#NAME?	#NAME?
475	#NAME?	#NAME?
476	#NAME?	#NAME?
477	#NAME?	#NAME?
478	#NAME?	#NAME?
479	#NAME?	#NAME?
480	#NAME?	#NAME?
481	#NAME?	#NAME?
482	#NAME?	#NAME?
483	#NAME?	#NAME?
484	#NAME?	#NAME?
485	#NAME?	#NAME?
486	#NAME?	#NAME?
487	#NAME?	#NAME?
488	#NAME?	#NAME?
489	#NAME?	#NAME?
490	#NAME?	#NAME?
491	#NAME?	#NAME?
492	#NAME?	#NAME?
493	#NAME?	#NAME?
494	#NAME?	#NAME?
495	#NAME?	#NAME?
496	#NAME?	#NAME?
497	#NAME?	#NAME?
498	#NAME?	#NAME?
499	#NAME?	#NAME?
500	#NAME?	#NAME?
501	#NAME?	#NAME?
502	#NAME?	#NAME?
503	#NAME?	#NAME?
504	#NAME?	#NAME?
505	#NAME?	#NAME?
506	#NAME?	#NAME?
507	#NAME?	#NAME?
508	#NAME?	#NAME?
509	#NAME?	#NAME?
510	#NAME?	#NAME?
511	#NAME?	#NAME?
512	#NAME?	#NAME?
513	#NAME?	#NAME?
514	#NAME?	#NAME?
515	#NAME?	#NAME?
516	#NAME?	#NAME?
517	#NAME?	#NAME?
518	#NAME?	#NAME?
519	#NAME?	#NAME?
520	#NAME?	#NAME?
521	#NAME?	#NAME?
522	#NAME?	#NAME?
523	#NAME?	#NAME?
524	#NAME?	#NAME?
525	#NAME?	#NAME?
526	#NAME?	#NAME?
527	#NAME?	#NAME?
528	#NAME?	#NAME?
529	#NAME?	#NAME?
530	#NAME?	#NAME?
531	#NAME?	#NAME?
532	#NAME?	#NAME?
533	#NAME?	#NAME?
534	#NAME?	#NAME?
535	#NAME?	#NAME?
536	#NAME?	#NAME?
537	#NAME?	#NAME?
538	#NAME?	#NAME?
539	#NAME?	#NAME?
540	#NAME?	#NAME?
541	#NAME?	#NAME?
542	#NAME?	#NAME?
543	#NAME?	#NAME?
544	#NAME?	#NAME?
545	#NAME?	#NAME?
546	#NAME?	#NAME?
547	#NAME?	#NAME?
548	#NAME?	#NAME?
549	#NAME?	#NAME?
550	#NAME?	#NAME?
551	#NAME?	#NAME?
552	#NAME?	#NAME?
553	#NAME?	#NAME?
554	#NAME?	#NAME?
555	#NAME?	#NAME?
556	#NAME?	#NAME?
557	#NAME?	#NAME?
558	#NAME?	#NAME?
559	#NAME?	#NAME?
560	#NAME?	#NAME?
561	#NAME?	#NAME?
562	#NAME?	#NAME?
563	#NAME?	#NAME?
564	#NAME?	#NAME?
565	#NAME?	#NAME?
566	#NAME?	#NAME?
567	#NAME?	#NAME?
568	#NAME?	#NAME?
569	#NAME?	#NAME?
570	#NAME?	#NAME?
571	#NAME?	#NAME?
572	#NAME?	#NAME?
573	#NAME?	#NAME?
574	#NAME?	#NAME?
575	#NAME?	#NAME?
576	#NAME?	#NAME?
577	#NAME?	#NAME?
578	#NAME?	#NAME?
579	#NAME?	#NAME?
580	#NAME?	#NAME?
581	#NAME?	#NAME?
582	#NAME?	#NAME?
583	#NAME?	#NAME?
584	#NAME?	#NAME?
585	#NAME?	#NAME?
586	#NAME?	#NAME?
587	#NAME?	#NAME?
588	#NAME?	#NAME?
589	#NAME?	#NAME?
590	#NAME?	#NAME?
591	#NAME?	#NAME?
592	#NAME?	#NAME?
593	#NAME?	#NAME?
594	#NAME?	#NAME?
595	#NAME?	#NAME?
596	#NAME?	#NAME?
597	#NAME?	#NAME?
598	#NAME?	#NAME?
599	#NAME?	#NAME?
600	#NAME?	#NAME?
601	#NAME?	#NAME?
602	#NAME?	#NAME?
603	#NAME?	#NAME?
604	#NAME?	#NAME?
605	#NAME?	#NAME?
606	#NAME?	#NAME?
607	#NAME?	#NAME?
608	#NAME?	#NAME?
609	#NAME?	#NAME?
610	#NAME?	#NAME?
611	#NAME?	#NAME?
612	#NAME?	#NAME?
613	#NAME?	#NAME?
614	#NAME?	#NAME?
615	#NAME?	#NAME?
616	#NAME?	#NAME?
617	#NAME?	#NAME?
618	#NAME?	#NAME?
619	#NAME?	#NAME?
620	#NAME?	#NAME?
621	#NAME?	#NAME?
622	#NAME?	#NAME?
623	#NAME?	#NAME?
624	#NAME?	#NAME?
625	#NAME?	#NAME?
626	#NAME?	#NAME?
627	#NAME?	#NAME?
628	#NAME?	#NAME?
629	#NAME?	#NAME?
630	#NAME?	#NAME?
631	#NAME?	#NAME?
632	#NAME?	#NAME?
633	#NAME?	#NAME?
634	#NAME?	#NAME?
635	#NAME?	#NAME?
636	#NAME?	#NAME?
637	#NAME?	#NAME?
638	#NAME?	#NAME?
639	#NAME?	#NAME?
640	#NAME?	#NAME?
641	#NAME?	#NAME?
642	#NAME?	#NAME?
643	#NAME?	#NAME?
644	#NAME?	#NAME?
645	#NAME?	#NAME?
646	#NAME?	#NAME?
647	#NAME?	#NAME?
648	#NAME?	#NAME?
649	#NAME?	#NAME?
650	#NAME?	#NAME?
651	#NAME?	#NAME?
652	#NAME?	#NAME?
653	#NAME?	#NAME?
654	#NAME?	#NAME?
655	#NAME?	#NAME?
656	#NAME?	#NAME?
657	#NAME?	#NAME?
658	#NAME?	#NAME?
659	#NAME?	#NAME?
660	#NAME?	#NAME?
661	#NAME?	#NAME?
662	#NAME?	#NAME?
663	#NAME?	#NAME?
664	#NAME?	#NAME?
665	#NAME?	#NAME?
666	#NAME?	#NAME?
667	#NAME?	#NAME?
668	#NAME?	#NAME?
669	#NAME?	#NAME?
670	#NAME?	#NAME?
671	#NAME?	#NAME?
672	#NAME?	#NAME?
673	#NAME?	#NAME?
674	#NAME?	#NAME?
675	#NAME?	#NAME?
676	#NAME?	#NAME?
677	#NAME?	#NAME?
678	#NAME?	#NAME?
679	#NAME?	#NAME?
680	#NAME?	#NAME?
681	#NAME?	#NAME?
682	#NAME?	#NAME?
683	#NAME?	#NAME?
684	#NAME?	#NAME?
685	#NAME?	#NAME?
686	#NAME?	#NAME?
687	#NAME?	#NAME?
688	#NAME?	#NAME?
689	#NAME?	#NAME?
690	#NAME?	#NAME?
691	#NAME?	#NAME?
692	#NAME?	#NAME?
693	#NAME?	#NAME?
694	#NAME?	#NAME?
695	#NAME?	#NAME?
696	#NAME?	#NAME?
697	#NAME?	#NAME?
698	#NAME?	#NAME?
699	#NAME?	#NAME?
700	#NAME?	#NAME?

## Sheet: Desc_HID1
1	#NAME?	#NAME?
2	#NAME?	#NAME?
3	#NAME?	#NAME?
4	#NAME?	#NAME?
5	#NAME?	#NAME?
6	#NAME?	#NAME?
7	#NAME?	#NAME?
8	#NAME?	#NAME?
9	#NAME?	#NAME?
10	#NAME?	#NAME?
11	#NAME?	#NAME?
12	#NAME?	#NAME?
13	#NAME?	#NAME?
14	#NAME?	#NAME?
15	#NAME?	#NAME?
16	#NAME?	#NAME?
17	#NAME?	#NAME?
18	#NAME?	#NAME?
19	#NAME?	#NAME?
20	#NAME?	#NAME?
21	#NAME?	#NAME?
22	#NAME?	#NAME?
23	#NAME?	#NAME?
24	#NAME?	#NAME?
25	#NAME?	#NAME?
26	#NAME?	#NAME?
27	#NAME?	#NAME?
28	#NAME?	#NAME?
29	#NAME?	#NAME?
30	#NAME?	#NAME?
31	#NAME?	#NAME?
32	#NAME?	#NAME?
33	#NAME?	#NAME?
34	#NAME?	#NAME?
35	#NAME?	#NAME?
36	#NAME?	#NAME?
37	#NAME?	#NAME?
38	#NAME?	#NAME?
39	#NAME?	#NAME?
40	#NAME?	#NAME?
41	#NAME?	#NAME?
42	#NAME?	#NAME?
43	#NAME?	#NAME?
44	#NAME?	#NAME?
45	#NAME?	#NAME?
46	#NAME?	#NAME?
47	#NAME?	#NAME?
48	#NAME?	#NAME?
49	#NAME?	#NAME?
50	#NAME?	#NAME?
51	#NAME?	#NAME?
52	#NAME?	#NAME?
53	#NAME?	#NAME?
54	#NAME?	#NAME?
55	#NAME?	#NAME?
56	#NAME?	#NAME?
57	#NAME?	#NAME?
58	#NAME?	#NAME?
59	#NAME?	#NAME?
60	#NAME?	#NAME?
61	#NAME?	#NAME?
62	#NAME?	#NAME?
63	#NAME?	#NAME?
64	#NAME?	#NAME?
65	#NAME?	#NAME?
66	#NAME?	#NAME?
67	#NAME?	#NAME?
68	#NAME?	#NAME?
69	#NAME?	#NAME?
70	#NAME?	#NAME?
71	#NAME?	#NAME?
72	#NAME?	#NAME?
73	#NAME?	#NAME?
74	#NAME?	#NAME?
75	#NAME?	#NAME?
76	#NAME?	#NAME?
77	#NAME?	#NAME?
78	#NAME?	#NAME?
79	#NAME?	#NAME?
80	#NAME?	#NAME?
81	#NAME?	#NAME?
82	#NAME?	#NAME?
83	#NAME?	#NAME?
84	#NAME?	#NAME?
85	#NAME?	#NAME?
86	#NAME?	#NAME?
87	#NAME?	#NAME?
88	#NAME?	#NAME?
89	#NAME?	#NAME?
90	#NAME?	#NAME?
91	#NAME?	#NAME?
92	#NAME?	#NAME?
93	#NAME?	#NAME?
94	#NAME?	#NAME?
95	#NAME?	#NAME?
96	#NAME?	#NAME?
97	#NAME?	#NAME?
98	#NAME?	#NAME?
99	#NAME?	#NAME?
100	#NAME?	#NAME?
101	#NAME?	#NAME?
102	#NAME?	#NAME?
103	#NAME?	#NAME?
104	#NAME?	#NAME?
105	#NAME?	#NAME?
106	#NAME?	#NAME?
107	#NAME?	#NAME?
108	#NAME?	#NAME?
109	#NAME?	#NAME?
110	#NAME?	#NAME?
111	#NAME?	#NAME?
112	#NAME?	#NAME?
113	#NAME?	#NAME?
114	#NAME?	#NAME?
115	#NAME?	#NAME?
116	#NAME?	#NAME?
117	#NAME?	#NAME?
118	#NAME?	#NAME?
119	#NAME?	#NAME?
120	#NAME?	#NAME?
121	#NAME?	#NAME?
122	#NAME?	#NAME?
123	#NAME?	#NAME?
124	#NAME?	#NAME?
125	#NAME?	#NAME?
126	#NAME?	#NAME?
127	#NAME?	#NAME?
128	#NAME?	#NAME?
129	#NAME?	#NAME?
130	#NAME?	#NAME?
131	#NAME?	#NAME?
132	#NAME?	#NAME?
133	#NAME?	#NAME?
134	#NAME?	#NAME?
135	#NAME?	#NAME?
136	#NAME?	#NAME?
137	#NAME?	#NAME?
138	#NAME?	#NAME?
139	#NAME?	#NAME?
140	#NAME?	#NAME?
141	#NAME?	#NAME?
142	#NAME?	#NAME?
143	#NAME?	#NAME?
144	#NAME?	#NAME?
145	#NAME?	#NAME?
146	#NAME?	#NAME?
147	#NAME?	#NAME?
148	#NAME?	#NAME?
149	#NAME?	#NAME?
150	#NAME?	#NAME?
151	#NAME?	#NAME?
152	#NAME?	#NAME?
153	#NAME?	#NAME?
154	#NAME?	#NAME?
155	#NAME?	#NAME?
156	#NAME?	#NAME?
157	#NAME?	#NAME?
158	#NAME?	#NAME?
159	#NAME?	#NAME?
160	#NAME?	#NAME?
161	#NAME?	#NAME?
162	#NAME?	#NAME?
163	#NAME?	#NAME?
164	#NAME?	#NAME?
165	#NAME?	#NAME?
166	#NAME?	#NAME?
167	#NAME?	#NAME?
168	#NAME?	#NAME?
169	#NAME?	#NAME?
170	#NAME?	#NAME?
171	#NAME?	#NAME?
172	#NAME?	#NAME?
173	#NAME?	#NAME?
174	#NAME?	#NAME?
175	#NAME?	#NAME?
176	#NAME?	#NAME?
177	#NAME?	#NAME?
178	#NAME?	#NAME?
179	#NAME?	#NAME?
180	#NAME?	#NAME?
181	#NAME?	#NAME?
182	#NAME?	#NAME?
183	#NAME?	#NAME?
184	#NAME?	#NAME?
185	#NAME?	#NAME?
186	#NAME?	#NAME?
187	#NAME?	#NAME?
188	#NAME?	#NAME?
189	#NAME?	#NAME?
190	#NAME?	#NAME?
191	#NAME?	#NAME?
192	#NAME?	#NAME?
193	#NAME?	#NAME?
194	#NAME?	#NAME?
195	#NAME?	#NAME?
196	#NAME?	#NAME?
197	#NAME?	#NAME?
198	#NAME?	#NAME?
199	#NAME?	#NAME?
200	#NAME?	#NAME?
201	#NAME?	#NAME?
202	#NAME?	#NAME?
203	#NAME?	#NAME?
204	#NAME?	#NAME?
205	#NAME?	#NAME?
206	#NAME?	#NAME?
207	#NAME?	#NAME?
208	#NAME?	#NAME?
209	#NAME?	#NAME?
210	#NAME?	#NAME?
211	#NAME?	#NAME?
212	#NAME?	#NAME?
213	#NAME?	#NAME?
214	#NAME?	#NAME?
215	#NAME?	#NAME?
216	#NAME?	#NAME?
217	#NAME?	#NAME?
218	#NAME?	#NAME?
219	#NAME?	#NAME?
220	#NAME?	#NAME?
221	#NAME?	#NAME?
222	#NAME?	#NAME?
223	#NAME?	#NAME?
224	#NAME?	#NAME?
225	#NAME?	#NAME?
226	#NAME?	#NAME?
227	#NAME?	#NAME?
228	#NAME?	#NAME?
229	#NAME?	#NAME?
230	#NAME?	#NAME?
231	#NAME?	#NAME?
232	#NAME?	#NAME?
233	#NAME?	#NAME?
234	#NAME?	#NAME?
235	#NAME?	#NAME?
236	#NAME?	#NAME?
237	#NAME?	#NAME?
238	#NAME?	#NAME?
239	#NAME?	#NAME?
240	#NAME?	#NAME?
241	#NAME?	#NAME?
242	#NAME?	#NAME?
243	#NAME?	#NAME?
244	#NAME?	#NAME?
245	#NAME?	#NAME?
246	#NAME?	#NAME?
247	#NAME?	#NAME?
248	#NAME?	#NAME?
249	#NAME?	#NAME?
250	#NAME?	#NAME?
251	#NAME?	#NAME?
252	#NAME?	#NAME?
253	#NAME?	#NAME?
254	#NAME?	#NAME?
255	#NAME?	#NAME?
256	#NAME?	#NAME?
257	#NAME?	#NAME?
258	#NAME?	#NAME?
259	#NAME?	#NAME?
260	#NAME?	#NAME?
261	#NAME?	#NAME?
262	#NAME?	#NAME?
263	#NAME?	#NAME?
264	#NAME?	#NAME?
265	#NAME?	#NAME?
266	#NAME?	#NAME?
267	#NAME?	#NAME?
268	#NAME?	#NAME?
269	#NAME?	#NAME?
270	#NAME?	#NAME?
271	#NAME?	#NAME?
272	#NAME?	#NAME?
273	#NAME?	#NAME?
274	#NAME?	#NAME?
275	#NAME?	#NAME?
276	#NAME?	#NAME?
277	#NAME?	#NAME?
278	#NAME?	#NAME?
279	#NAME?	#NAME?
280	#NAME?	#NAME?
281	#NAME?	#NAME?
282	#NAME?	#NAME?
283	#NAME?	#NAME?
284	#NAME?	#NAME?
285	#NAME?	#NAME?
286	#NAME?	#NAME?
287	#NAME?	#NAME?
288	#NAME?	#NAME?
289	#NAME?	#NAME?
290	#NAME?	#NAME?
291	#NAME?	#NAME?
292	#NAME?	#NAME?
293	#NAME?	#NAME?
294	#NAME?	#NAME?
295	#NAME?	#NAME?
296	#NAME?	#NAME?
297	#NAME?	#NAME?
298	#NAME?	#NAME?
299	#NAME?	#NAME?
300	#NAME?	#NAME?
301	#NAME?	#NAME?
302	#NAME?	#NAME?
303	#NAME?	#NAME?
304	#NAME?	#NAME?
305	#NAME?	#NAME?
306	#NAME?	#NAME?
307	#NAME?	#NAME?
308	#NAME?	#NAME?
309	#NAME?	#NAME?
310	#NAME?	#NAME?
311	#NAME?	#NAME?
312	#NAME?	#NAME?
313	#NAME?	#NAME?
314	#NAME?	#NAME?
315	#NAME?	#NAME?
316	#NAME?	#NAME?
317	#NAME?	#NAME?
318	#NAME?	#NAME?
319	#NAME?	#NAME?
320	#NAME?	#NAME?
321	#NAME?	#NAME?
322	#NAME?	#NAME?
323	#NAME?	#NAME?
324	#NAME?	#NAME?
325	#NAME?	#NAME?
326	#NAME?	#NAME?
327	#NAME?	#NAME?
328	#NAME?	#NAME?
329	#NAME?	#NAME?
330	#NAME?	#NAME?
331	#NAME?	#NAME?
332	#NAME?	#NAME?
333	#NAME?	#NAME?
334	#NAME?	#NAME?
335	#NAME?	#NAME?
336	#NAME?	#NAME?
337	#NAME?	#NAME?
338	#NAME?	#NAME?
339	#NAME?	#NAME?
340	#NAME?	#NAME?
341	#NAME?	#NAME?
342	#NAME?	#NAME?
343	#NAME?	#NAME?
344	#NAME?	#NAME?
345	#NAME?	#NAME?
346	#NAME?	#NAME?
347	#NAME?	#NAME?
348	#NAME?	#NAME?
349	#NAME?	#NAME?
350	#NAME?	#NAME?
351	#NAME?	#NAME?
352	#NAME?	#NAME?
353	#NAME?	#NAME?
354	#NAME?	#NAME?
355	#NAME?	#NAME?
356	#NAME?	#NAME?
357	#NAME?	#NAME?
358	#NAME?	#NAME?
359	#NAME?	#NAME?
360	#NAME?	#NAME?
361	#NAME?	#NAME?
362	#NAME?	#NAME?
363	#NAME?	#NAME?
364	#NAME?	#NAME?
365	#NAME?	#NAME?
366	#NAME?	#NAME?
367	#NAME?	#NAME?
368	#NAME?	#NAME?
369	#NAME?	#NAME?
370	#NAME?	#NAME?
371	#NAME?	#NAME?
372	#NAME?	#NAME?
373	#NAME?	#NAME?
374	#NAME?	#NAME?
375	#NAME?	#NAME?
376	#NAME?	#NAME?
377	#NAME?	#NAME?
378	#NAME?	#NAME?
379	#NAME?	#NAME?
380	#NAME?	#NAME?
381	#NAME?	#NAME?
382	#NAME?	#NAME?
383	#NAME?	#NAME?
384	#NAME?	#NAME?
385	#NAME?	#NAME?
386	#NAME?	#NAME?
387	#NAME?	#NAME?
388	#NAME?	#NAME?
389	#NAME?	#NAME?
390	#NAME?	#NAME?
391	#NAME?	#NAME?
392	#NAME?	#NAME?
393	#NAME?	#NAME?
394	#NAME?	#NAME?
395	#NAME?	#NAME?
396	#NAME?	#NAME?
397	#NAME?	#NAME?
398	#NAME?	#NAME?
399	#NAME?	#NAME?
400	#NAME?	#NAME?
401	#NAME?	#NAME?
402	#NAME?	#NAME?
403	#NAME?	#NAME?
404	#NAME?	#NAME?
405	#NAME?	#NAME?
406	#NAME?	#NAME?
407	#NAME?	#NAME?
408	#NAME?	#NAME?
409	#NAME?	#NAME?
410	#NAME?	#NAME?
411	#NAME?	#NAME?
412	#NAME?	#NAME?
413	#NAME?	#NAME?
414	#NAME?	#NAME?
415	#NAME?	#NAME?
416	#NAME?	#NAME?
417	#NAME?	#NAME?
418	#NAME?	#NAME?
419	#NAME?	#NAME?
420	#NAME?	#NAME?
421	#NAME?	#NAME?
422	#NAME?	#NAME?
423	#NAME?	#NAME?
424	#NAME?	#NAME?
425	#NAME?	#NAME?
426	#NAME?	#NAME?
427	#NAME?	#NAME?
428	#NAME?	#NAME?
429	#NAME?	#NAME?
430	#NAME?	#NAME?
431	#NAME?	#NAME?
432	#NAME?	#NAME?
433	#NAME?	#NAME?
434	#NAME?	#NAME?
435	#NAME?	#NAME?
436	#NAME?	#NAME?
437	#NAME?	#NAME?
438	#NAME?	#NAME?
439	#NAME?	#NAME?
440	#NAME?	#NAME?
441	#NAME?	#NAME?
442	#NAME?	#NAME?
443	#NAME?	#NAME?
444	#NAME?	#NAME?
445	#NAME?	#NAME?
446	#NAME?	#NAME?
447	#NAME?	#NAME?
448	#NAME?	#NAME?
449	#NAME?	#NAME?
450	#NAME?	#NAME?
451	#NAME?	#NAME?
452	#NAME?	#NAME?
453	#NAME?	#NAME?
454	#NAME?	#NAME?
455	#NAME?	#NAME?
456	#NAME?	#NAME?
457	#NAME?	#NAME?
458	#NAME?	#NAME?
459	#NAME?	#NAME?
460	#NAME?	#NAME?
461	#NAME?	#NAME?
462	#NAME?	#NAME?
463	#NAME?	#NAME?
464	#NAME?	#NAME?
465	#NAME?	#NAME?
466	#NAME?	#NAME?
467	#NAME?	#NAME?
468	#NAME?	#NAME?
469	#NAME?	#NAME?
470	#NAME?	#NAME?
471	#NAME?	#NAME?
472	#NAME?	#NAME?
473	#NAME?	#NAME?
474	#NAME?	#NAME?
475	#NAME?	#NAME?
476	#NAME?	#NAME?
477	#NAME?	#NAME?
478	#NAME?	#NAME?
479	#NAME?	#NAME?
480	#NAME?	#NAME?
481	#NAME?	#NAME?
482	#NAME?	#NAME?
483	#NAME?	#NAME?
484	#NAME?	#NAME?
485	#NAME?	#NAME?
486	#NAME?	#NAME?
487	#NAME?	#NAME?
488	#NAME?	#NAME?
489	#NAME?	#NAME?
490	#NAME?	#NAME?
491	#NAME?	#NAME?
492	#NAME?	#NAME?
493	#NAME?	#NAME?
494	#NAME?	#NAME?
495	#NAME?	#NAME?
496	#NAME?	#NAME?
497	#NAME?	#NAME?
498	#NAME?	#NAME?
499	#NAME?	#NAME?
500	#NAME?	#NAME?
501	#NAME?	#NAME?
502	#NAME?	#NAME?
503	#NAME?	#NAME?
504	#NAME?	#NAME?
505	#NAME?	#NAME?
506	#NAME?	#NAME?
507	#NAME?	#NAME?
508	#NAME?	#NAME?
509	#NAME?	#NAME?
510	#NAME?	#NAME?
511	#NAME?	#NAME?
512	#NAME?	#NAME?
513	#NAME?	#NAME?
514	#NAME?	#NAME?
515	#NAME?	#NAME?
516	#NAME?	#NAME?
517	#NAME?	#NAME?
518	#NAME?	#NAME?
519	#NAME?	#NAME?
520	#NAME?	#NAME?
521	#NAME?	#NAME?
522	#NAME?	#NAME?
523	#NAME?	#NAME?
524	#NAME?	#NAME?
525	#NAME?	#NAME?
526	#NAME?	#NAME?
527	#NAME?	#NAME?
528	#NAME?	#NAME?
529	#NAME?	#NAME?
530	#NAME?	#NAME?
531	#NAME?	#NAME?
532	#NAME?	#NAME?
533	#NAME?	#NAME?
534	#NAME?	#NAME?
535	#NAME?	#NAME?
536	#NAME?	#NAME?
537	#NAME?	#NAME?
538	#NAME?	#NAME?
539	#NAME?	#NAME?
540	#NAME?	#NAME?
541	#NAME?	#NAME?
542	#NAME?	#NAME?
543	#NAME?	#NAME?
544	#NAME?	#NAME?
545	#NAME?	#NAME?
546	#NAME?	#NAME?
547	#NAME?	#NAME?
548	#NAME?	#NAME?
549	#NAME?	#NAME?
550	#NAME?	#NAME?
551	#NAME?	#NAME?
552	#NAME?	#NAME?
553	#NAME?	#NAME?
554	#NAME?	#NAME?
555	#NAME?	#NAME?
556	#NAME?	#NAME?
557	#NAME?	#NAME?
558	#NAME?	#NAME?
559	#NAME?	#NAME?
560	#NAME?	#NAME?
561	#NAME?	#NAME?
562	#NAME?	#NAME?
563	#NAME?	#NAME?
564	#NAME?	#NAME?
565	#NAME?	#NAME?
566	#NAME?	#NAME?
567	#NAME?	#NAME?
568	#NAME?	#NAME?
569	#NAME?	#NAME?
570	#NAME?	#NAME?
571	#NAME?	#NAME?
572	#NAME?	#NAME?
573	#NAME?	#NAME?
574	#NAME?	#NAME?
575	#NAME?	#NAME?
576	#NAME?	#NAME?
577	#NAME?	#NAME?
578	#NAME?	#NAME?
579	#NAME?	#NAME?
580	#NAME?	#NAME?
581	#NAME?	#NAME?
582	#NAME?	#NAME?
583	#NAME?	#NAME?
584	#NAME?	#NAME?
585	#NAME?	#NAME?
586	#NAME?	#NAME?
587	#NAME?	#NAME?
588	#NAME?	#NAME?
589	#NAME?	#NAME?
590	#NAME?	#NAME?
591	#NAME?	#NAME?
592	#NAME?	#NAME?
593	#NAME?	#NAME?
594	#NAME?	#NAME?
595	#NAME?	#NAME?
596	#NAME?	#NAME?
597	#NAME?	#NAME?
598	#NAME?	#NAME?
599	#NAME?	#NAME?
600	#NAME?	#NAME?
601	#NAME?	#NAME?
602	#NAME?	#NAME?
603	#NAME?	#NAME?
604	#NAME?	#NAME?
605	#NAME?	#NAME?
606	#NAME?	#NAME?
607	#NAME?	#NAME?
608	#NAME?	#NAME?
609	#NAME?	#NAME?
610	#NAME?	#NAME?
611	#NAME?	#NAME?
612	#NAME?	#NAME?
613	#NAME?	#NAME?
614	#NAME?	#NAME?
615	#NAME?	#NAME?
616	#NAME?	#NAME?
617	#NAME?	#NAME?
618	#NAME?	#NAME?
619	#NAME?	#NAME?
620	#NAME?	#NAME?
621	#NAME?	#NAME?
622	#NAME?	#NAME?
623	#NAME?	#NAME?
624	#NAME?	#NAME?
625	#NAME?	#NAME?
626	#NAME?	#NAME?
627	#NAME?	#NAME?
628	#NAME?	#NAME?
629	#NAME?	#NAME?
630	#NAME?	#NAME?
631	#NAME?	#NAME?
632	#NAME?	#NAME?
633	#NAME?	#NAME?
634	#NAME?	#NAME?
635	#NAME?	#NAME?
636	#NAME?	#NAME?
637	#NAME?	#NAME?
638	#NAME?	#NAME?
639	#NAME?	#NAME?
640	#NAME?	#NAME?
641	#NAME?	#NAME?
642	#NAME?	#NAME?
643	#NAME?	#NAME?
644	#NAME?	#NAME?
645	#NAME?	#NAME?
646	#NAME?	#NAME?
647	#NAME?	#NAME?
648	#NAME?	#NAME?
649	#NAME?	#NAME?
650	#NAME?	#NAME?
651	#NAME?	#NAME?
652	#NAME?	#NAME?
653	#NAME?	#NAME?
654	#NAME?	#NAME?
655	#NAME?	#NAME?
656	#NAME?	#NAME?
657	#NAME?	#NAME?
658	#NAME?	#NAME?
659	#NAME?	#NAME?
660	#NAME?	#NAME?
661	#NAME?	#NAME?
662	#NAME?	#NAME?
663	#NAME?	#NAME?
664	#NAME?	#NAME?
665	#NAME?	#NAME?
666	#NAME?	#NAME?
667	#NAME?	#NAME?
668	#NAME?	#NAME?
669	#NAME?	#NAME?
670	#NAME?	#NAME?
671	#NAME?	#NAME?
672	#NAME?	#NAME?
673	#NAME?	#NAME?
674	#NAME?	#NAME?
675	#NAME?	#NAME?
676	#NAME?	#NAME?
677	#NAME?	#NAME?
678	#NAME?	#NAME?
679	#NAME?	#NAME?
680	#NAME?	#NAME?
681	#NAME?	#NAME?
682	#NAME?	#NAME?
683	#NAME?	#NAME?
684	#NAME?	#NAME?
685	#NAME?	#NAME?
686	#NAME?	#NAME?
687	#NAME?	#NAME?
688	#NAME?	#NAME?
689	#NAME?	#NAME?
690	#NAME?	#NAME?
691	#NAME?	#NAME?
692	#NAME?	#NAME?
693	#NAME?	#NAME?
694	#NAME?	#NAME?
695	#NAME?	#NAME?
696	#NAME?	#NAME?
697	#NAME?	#NAME?
698	#NAME?	#NAME?
699	#NAME?	#NAME?
700	#NAME?	#NAME?

## Sheet: BD
REGION	Année	FEC attendues	FEC recues (CPN+SA)	Taux fréquentation	FEC testées au VIH	Taux de dépistage	FEC testées positives au VIH	Taux de positivité	FEC mise sous TARV	Couverture ARV	FEC ayant effctué la CV	FEC avec CV supprimée	EE nes FEC VIH+	EE mis sous NVP	Taux couverture en Névirapine des EE	EE testes au VIH	Taux dépistage EE	EE testes VIH+	Taux de positivité des EE	Eemis sous TARV	Couverture ARV EE VIH+						2023	2022	2021	2020	2019	2018	2017	2016	2015	2014	2013	2012	2011	2010
Adamaoua	2023	62535	64785	1.03598	61451	0.948537	1385	0.0225383	1352	0.976173			1022	1008	0.986301	1009	0.98728	51	0.0505451	44	0.862745						62535	63106	62907	55182	54267	52803				44434	56599	54025		50456
Adamaoua	2022	63106	62884	0.996482	62387	0.992097	1310	0.020998	1307	0.99771			981	953	0.971458	947	0.965341	56	0.0591341	50	0.892857						64785	62884	64444	57148	51987	51991				35823	36960	32619		32154
Adamaoua	2021	62907	64444	1.02443	63078	0.978803	1525	0.0241764	1498	0.982295	1026	927	964	940	0.975104	784	0.813278	31	0.0395408	24	0.774194						61451	62387	63078	55382	44371	52114	47297			31290	24802	18218		20821
Adamaoua	2020	55182	57148	1.03563	55382	0.969098	1408	0.0254234	1393	0.989347			963	917	0.952233	840	0.872274	28	0.0333333	36	1.28571						1385	1310	1525	1408	1225	1717	1474			1309	1478	1041		1294
Adamaoua	2019	54267	51987	0.957986	44371	0.853502	1225	0.0276081	1217	0.993469			940	935	0.994681	805	0.856383	22	0.0273292	19	0.863636						1352	1307	1498	1393	1217					1387	286	165		803
Adamaoua	2018	52803	51991	0.984622	52114	1.00237	1717	0.032947		0					#DIV/0!		#DIV/0!		#DIV/0!		#DIV/0!								1026								181	149		156
Adamaoua	2017			#DIV/0!	47297	#DIV/0!	1474	0.0311648		0					#DIV/0!		#DIV/0!		#DIV/0!		#DIV/0!								927
Adamaoua	2016			#DIV/0!		#DIV/0!		#DIV/0!		#DIV/0!					#DIV/0!		#DIV/0!		#DIV/0!		#DIV/0!						1022	981	964	963	940
Adamaoua	2015			#DIV/0!		#DIV/0!		#DIV/0!		#DIV/0!					#DIV/0!		#DIV/0!		#DIV/0!		#DIV/0!						1008	953	940	917	935						463	478		316
Adamaoua	2014	44434	35823	0.806207	31290	0.873461	1309	0.0418345	1387	1.05959					#DIV/0!		#DIV/0!		#DIV/0!		#DIV/0!						1009	947	784	840	805						241	284
Adamaoua	2013	56599	36960	0.653015	24802	0.67105	1478	0.059592	286	0.193505	181			463	#DIV/0!	241	#DIV/0!	29	0.120332		0						51	56	31	28	22						29	43
Adamaoua	2012	54025	32619	0.603776	18218	0.558509	1041	0.0571413	165	0.158501	149			478	#DIV/0!	284	#DIV/0!	43	0.151408		0						44	50	24	36	19
Adamaoua	2011			#DIV/0!		#DIV/0!		#DIV/0!		#DIV/0!					#DIV/0!		#DIV/0!		#DIV/0!		#DIV/0!
Adamaoua	2010	50456	32154	0.637268	20821	0.64754	1294	0.0621488	803	0.620556	156			316	#DIV/0!		#DIV/0!		#DIV/0!		#DIV/0!
Est	2023	51099	59541	1.16521	58001	0.974135	1981	0.0341546	17.36	0.00876325			1299	1209	0.930716	927	0.713626	26	0.0280475	21	0.807692						51099	49951	48801	40145	40196	39283					41210	40774		39783
Est	2022	49951	66768	1.33667	64717	0.969282	1998	0.0308729	1805	0.903403			1253	1146	0.914605	1060	0.84597	52	0.0490566	42	0.807692						59541	66768	66440	57608	51998	49816					27425	18692		7943
Est	2021	48801	66440	1.36145	63866	0.961258	2274	0.0356058	1932	0.849604	971	832	1213	1124	0.926628	1024	0.844188	62	0.0605469	57	0.919355						58001	64717	63866	54104	45074	49013	50209				24168	15457		6456
Est	2020	40145	57608	1.435	54104	0.939175	2515	0.0464845	1843	0.732803			1121	850	0.758252	847	0.755575	75	0.0885478	34	0.453333						1981	1998	2274	2515	2091	2712	7649				1471	2056		608
Est	2019	40196	51998	1.29361	45074	0.866841	2091	0.0463904	1566	0.748924			1331	871	0.654395	636	0.477836	38	0.0597484	16	0.421053						17.36	1805	1932	1843	1566						385	303		490
Est	2018	39283	49816	1.26813	49013	0.983881	2712	0.0553323		0					#DIV/0!		#DIV/0!		#DIV/0!		#DIV/0!								971								147	167		79
Est	2017			#DIV/0!	50209	#DIV/0!	7649	0.152343		0					#DIV/0!		#DIV/0!		#DIV/0!		#DIV/0!								832
Est	2016			#DIV/0!		#DIV/0!		#DIV/0!		#DIV/0!					#DIV/0!		#DIV/0!		#DIV/0!		#DIV/0!						1299	1253	1213	1121	1331
Est	2015			#DIV/0!		#DIV/0!		#DIV/0!		#DIV/0!					#DIV/0!		#DIV/0!		#DIV/0!		#DIV/0!						1209	1146	1124	850	871						641	627		189
Est	2014			#DIV/0!		#DIV/0!		#DIV/0!		#DIV/0!					#DIV/0!		#DIV/0!		#DIV/0!		#DIV/0!						927	1060	1024	847	636						332	330
Est	2013	41210	27425	0.665494	24168	0.88124	1471	0.0608656	385	0.261727	147			641	#DIV/0!	332	#DIV/0!	21	0.063253		0						26	52	62	75	38						21	43
Est	2012	40774	18692	0.458429	15457	0.826931	2056	0.133014	303	0.147374	167			627	#DIV/0!	330	#DIV/0!	43	0.130303		0						21	42	57	34	16
Est	2011			#DIV/0!		#DIV/0!		#DIV/0!		#DIV/0!					#DIV/0!		#DIV/0!		#DIV/0!		#DIV/0!
Est	2010	39783	7943	0.199658	6456	0.812791	608	0.094176	490	0.805921	79			189	#DIV/0!		#DIV/0!		#DIV/0!		#DIV/0!
Centre	2023	152917	143660	0.939464	135595	0.943861	4674	0.0344703	31.77	0.00679718			3168	2831	0.893624	2845	0.898043	122	0.0428822	79	0.647541						152917	156770	153793	138647	143348	139817					195991	186539		176596
Centre	2022	156770	146831	0.936601	140041	0.953756	4781	0.03414	3728	0.779753			3245	2909	0.896456	3463	1.06718	120	0.034652	77	0.641667						143660	146831	147877	136556	131222	141180					104232	64027		73438
Centre	2021	153793	147877	0.961533	140150	0.947747	4961	0.0353978	4270	0.860714	4015	3856	3456	3053	0.883391	3274	0.947338	140	0.0427611	78	0.557143						135595	140041	140150	126779	122549	137284	124240				87290	57812		69373
Centre	2020	138647	136556	0.984919	126779	0.928403	5448	0.0429724	4053	0.743943			3707	3054	0.823847	3521	0.949825	122	0.0346492	72	0.590164						4674	4781	4961	5448	5104	6376	3819				5113	4464		5615
Centre	2019	143348	131222	0.915409	122549	0.933906	5104	0.0416486	4581	0.897531			3826	3475	0.908259	4558	1.19132	239	0.0524353	103	0.430962						31.77	3728	4270	4053	4581						2227	871		3851
Centre	2018	139817	141180	1.00975	137284	0.972404	6376	0.0464439		0					#DIV/0!		#DIV/0!		#DIV/0!		#DIV/0!								4015								1852	1177		962
Centre	2017			#DIV/0!	124240	#DIV/0!	3819	0.0307389		0					#DIV/0!		#DIV/0!		#DIV/0!		#DIV/0!								3856
Centre	2016			#DIV/0!		#DIV/0!		#DIV/0!		#DIV/0!					#DIV/0!		#DIV/0!		#DIV/0!		#DIV/0!						3168	3245	3456	3707	3826
Centre	2015			#DIV/0!		#DIV/0!		#DIV/0!		#DIV/0!					#DIV/0!		#DIV/0!		#DIV/0!		#DIV/0!						2831	2909	3053	3054	3475						3439	409		189
Centre	2014			#DIV/0!		#DIV/0!		#DIV/0!		#DIV/0!					#DIV/0!		#DIV/0!		#DIV/0!		#DIV/0!						2845	3463	3274	3521	4558						2248	346
Centre	2013	195991	104232	0.53182	87290	0.837459	5113	0.0585749	2227	0.435556	1852			3439	#DIV/0!	2248	#DIV/0!	158	0.0702847		0						122	120	140	122	239						158	48
Centre	2012	186539	64027	0.343237	57812	0.902932	4464	0.0772158	871	0.195116	1177			409	#DIV/0!	346	#DIV/0!	48	0.138728		0						79	77	78	72	103
Centre	2011			#DIV/0!		#DIV/0!		#DIV/0!		#DIV/0!					#DIV/0!		#DIV/0!		#DIV/0!		#DIV/0!
Centre	2010	176596	73438	0.415853	69373	0.944647	5615	0.0809393	3851	0.685841	962			189	#DIV/0!		#DIV/0!		#DIV/0!		#DIV/0!
Extrême-Nord	2023	250651	175606	0.7006	167164	0.951926	1244	0.00744179	8.51	0.00684084			656	592	0.902439	721	1.09909	39	0.0540915	32	0.820513						250651	243114	236616	231577	218892	212434					190157	183481		173685
Extrême-Nord	2022	243114	183473	0.754679	174992	0.953775	1174	0.00670888	1107	0.94293			727	662	0.910591	644	0.885832	47	0.0729814	44	0.93617						175606	183473	179214	158838	149500	147163					96724	52412		35292
Extrême-Nord	2021	236616	179214	0.757404	160056	0.8931	1064	0.00664767	940	0.883459	757	703	677	553	0.816839	492	0.726736	37	0.0752033	31	0.837838						167164	174992	160056	121090	92750	124382	113212				46728	26611		14662
Extrême-Nord	2020	231577	158838	0.685897	121090	0.762349	1190	0.0098274	993	0.834454			651	507	0.778802	553	0.849462	17	0.0307414	26	1.52941						1244	1174	1064	1190	1124	1510	5838				1080	684		622
Extrême-Nord	2019	218892	149500	0.682985	92750	0.620401	1124	0.0121186	856	0.761566			724	538	0.743094	394	0.544199	36	0.0913706	14	0.388889						8.51	1107	940	993	856						238	92		244
Extrême-Nord	2018	212434	147163	0.692747	124382	0.845199	1510	0.01214		0					#DIV/0!		#DIV/0!		#DIV/0!		#DIV/0!								757								210	479		28
Extrême-Nord	2017			#DIV/0!	113212	#DIV/0!	5838	0.051567		0					#DIV/0!		#DIV/0!		#DIV/0!		#DIV/0!								703
Extrême-Nord	2016			#DIV/0!		#DIV/0!		#DIV/0!		#DIV/0!					#DIV/0!		#DIV/0!		#DIV/0!		#DIV/0!						656	727	677	651	724
Extrême-Nord	2015			#DIV/0!		#DIV/0!		#DIV/0!		#DIV/0!					#DIV/0!		#DIV/0!		#DIV/0!		#DIV/0!						592	662	553	507	538						518	2112		142
Extrême-Nord	2014			#DIV/0!		#DIV/0!		#DIV/0!		#DIV/0!					#DIV/0!		#DIV/0!		#DIV/0!		#DIV/0!						721	644	492	553	394						243	268
Extrême-Nord	2013	190157	96724	0.508653	46728	0.483107	1080	0.0231125	238	0.22037	210			518	#DIV/0!	243	#DIV/0!	24	0.0987654		0						39	47	37	17	36						24	37
Extrême-Nord	2012	183481	52412	0.285654	26611	0.507727	684	0.0257037	92	0.134503	479			2112	#DIV/0!	268	#DIV/0!	37	0.13806		0						32	44	31	26	14
Extrême-Nord	2011			#DIV/0!		#DIV/0!		#DIV/0!		#DIV/0!					#DIV/0!		#DIV/0!		#DIV/0!		#DIV/0!
Extrême-Nord	2010	173685	35292	0.203195	14662	0.415448	622	0.0424226	244	0.392283	28			142	#DIV/0!		#DIV/0!		#DIV/0!		#DIV/0!
Littoral	2023	119154	100548	0.843849	95492	0.949716	3032	0.0317514	2367	0.780673			2343	2334	0.996159	2263	0.965856	63	0.0278392	57	0.904762						119154	116634	114075	101014	102697	100194					158722	151882		143605
Littoral	2022	116634	104410	0.895194	99242	0.950503	2703	0.0272365	2601	0.962264			2299	2243	0.975642	2280	0.991736	55	0.0241228	53	0.963636						100548	104410	108441	95539	104662	116545					68158	59090		59821
Littoral	2021	114075	108441	0.950611	102878	0.9487	3155	0.0306674	2885	0.914422	517	505	2507	2360	0.941364	1753	0.699242	59	0.0336566	46	0.779661						95492	99242	102878	90391	95605	113860	95871				77638	66695		57842
Littoral	2020	101014	95539	0.9458	90391	0.946116	3718	0.0411324	2835	0.762507			2586	2275	0.879737	2070	0.800464	136	0.0657005	60	0.441176						3032	2703	3155	3718	4221	4866	2165				3278	3249		4133
Littoral	2019	102697	104662	1.01913	95605	0.913464	4221	0.0441504	3074	0.728263			3044	2538	0.833771	3443	1.13108	214	0.0621551	64	0.299065						2367	2601	2885	2835	3074						1264	1589		3974
Littoral	2018	100194	116545	1.16319	113860	0.976962	4866	0.0427367		0					#DIV/0!		#DIV/0!		#DIV/0!		#DIV/0!								517								1551	1267		1155
Littoral	2017			#DIV/0!	95871	#DIV/0!	2165	0.0225824		0					#DIV/0!		#DIV/0!		#DIV/0!		#DIV/0!								505
Littoral	2016			#DIV/0!		#DIV/0!		#DIV/0!		#DIV/0!					#DIV/0!		#DIV/0!		#DIV/0!		#DIV/0!						2343	2299	2507	2586	3044
Littoral	2015			#DIV/0!		#DIV/0!		#DIV/0!		#DIV/0!					#DIV/0!		#DIV/0!		#DIV/0!		#DIV/0!						2334	2243	2360	2275	2538						2856	870		2026
Littoral	2014			#DIV/0!		#DIV/0!		#DIV/0!		#DIV/0!					#DIV/0!		#DIV/0!		#DIV/0!		#DIV/0!						2263	2280	1753	2070	3443						2105	251
Littoral	2013	158722	68158	0.429417	77638	1.13909	3278	0.0422216	1264	0.385601	1551			2856	#DIV/0!	2105	#DIV/0!	78	0.0370546		0						63	55	59	136	214						78	20
Littoral	2012	151882	59090	0.389052	66695	1.1287	3249	0.0487143	1589	0.489074	1267			870	#DIV/0!	251	#DIV/0!	20	0.0796813		0						57	53	46	60	64
Littoral	2011			#DIV/0!		#DIV/0!		#DIV/0!		#DIV/0!					#DIV/0!		#DIV/0!		#DIV/0!		#DIV/0!
Littoral	2010	143605	59821	0.416566	57842	0.966918	4133	0.0714533	3974	0.961529	1155			2026	#DIV/0!		#DIV/0!		#DIV/0!		#DIV/0!
Nord	2023	145279	108494	0.746798	107250	0.988534	1277	0.0119068	10.54	0.00825372			785	727	0.926115	766	0.975796	32	0.0417755	24	0.75						145279	140775	136152	133414	129817	125063					115559	92760		102852
Nord	2022	140775	116018	0.824138	113619	0.979322	1195	0.0105176	1145	0.958159			753	696	0.924303	741	0.984064	47	0.0634278	34	0.723404						108494	116018	42169	116983	101150	97598					80247	58689		56330
Nord	2021	136152	42169	0.30972	42136	0.999217	1318	0.0312797	1285	0.974962	984	807	722	627	0.868421	761	1.05402	71	0.0932983	42	0.591549						107250	113619	42136	99751	68421	95909	80825				23233	23744		22294
Nord	2020	133414	116983	0.876842	99751	0.852697	1093	0.0109573	996	0.911253			714	542	0.759104	1018	1.42577	82	0.0805501	12	0.146341						1277	1195	1318	1093	1002	1780	1042				638	715		1242
Nord	2019	129817	101150	0.779174	68421	0.676431	1002	0.0146446	937	0.93513			800	646	0.8075	795	0.99375	36	0.045283	14	0.388889						10.54	1145	1285	996	937						155	184		535
Nord	2018	125063	97598	0.780391	95909	0.982694	1780	0.0185593		0					#DIV/0!		#DIV/0!		#DIV/0!		#DIV/0!								984								81	173		182
Nord	2017			#DIV/0!	80825	#DIV/0!	1042	0.0128921		0					#DIV/0!		#DIV/0!		#DIV/0!		#DIV/0!								807
Nord	2016			#DIV/0!		#DIV/0!		#DIV/0!		#DIV/0!					#DIV/0!		#DIV/0!		#DIV/0!		#DIV/0!						785	753	722	714	800
Nord	2015			#DIV/0!		#DIV/0!		#DIV/0!		#DIV/0!					#DIV/0!		#DIV/0!		#DIV/0!		#DIV/0!						727	696	627	542	646						219	2212		222
Nord	2014			#DIV/0!		#DIV/0!		#DIV/0!		#DIV/0!					#DIV/0!		#DIV/0!		#DIV/0!		#DIV/0!						766	741	761	1018	795						177	2046
Nord	2013	115559	80247	0.694424	23233	0.289519	638	0.0274609	155	0.242947	81			219	#DIV/0!	177	#DIV/0!	19	0.107345		0						32	47	71	82	36						19	200
Nord	2012	92760	58689	0.632697	23744	0.404573	715	0.0301129	184	0.257343	173			2212	#DIV/0!	2046	#DIV/0!	200	0.0977517		0						24	34	42	12	14
Nord	2011			#DIV/0!		#DIV/0!		#DIV/0!		#DIV/0!					#DIV/0!		#DIV/0!		#DIV/0!		#DIV/0!
Nord	2010	102852	56330	0.54768	22294	0.395775	1242	0.0557101	535	0.430757	182			222	#DIV/0!		#DIV/0!		#DIV/0!		#DIV/0!
Ouest	2023	98139	77743	0.792172	76647	0.985902	1298	0.0169348	10.22	0.00787365			1107	1080	0.97561	1235	1.11563	13	0.0105263	11	0.846154						98139	97071	95798	86648	85983	84988					93270	111108		89268
Ouest	2022	97071	74800	0.77057	74624	0.997647	1254	0.0168042	1237	0.986443			1230	1215	0.987805	1360	1.10569	21	0.0154412	16	0.761905						77743	74800	79466	72240	65649	63115					48807	44670		31628
Ouest	2021	95798	79466	0.829516	78900	0.992877	1394	0.0176679	1345	0.964849	666	644	1284	1179	0.918224	1240	0.965732	21	0.0169355	22	1.04762						76647	74624	78900	71723	63084	62749	62325				44861	42245		30326
Ouest	2020	86648	72240	0.833718	71723	0.992843	1508	0.0210253	1447	0.959549			1270	1170	0.92126	1631	1.28425	31	0.0190067	32	1.03226						1298	1254	1394	1508	1571	1649	1103				2261	2922		1625
Ouest	2019	85983	65649	0.763511	63084	0.960929	1571	0.0249033	1477	0.940165			1390	1295	0.931655	1213	0.872662	31	0.0255565	16	0.516129						10.22	1237	1345	1447	1477						439	333		602
Ouest	2018	84988	63115	0.742634	62749	0.994201	1649	0.0262793		0					#DIV/0!		#DIV/0!		#DIV/0!		#DIV/0!								666								494	1290		99
Ouest	2017			#DIV/0!	62325	#DIV/0!	1103	0.0176976		0					#DIV/0!		#DIV/0!		#DIV/0!		#DIV/0!								644
Ouest	2016			#DIV/0!		#DIV/0!		#DIV/0!		#DIV/0!					#DIV/0!		#DIV/0!		#DIV/0!		#DIV/0!						1107	1230	1284	1270	1390
Ouest	2015			#DIV/0!		#DIV/0!		#DIV/0!		#DIV/0!					#DIV/0!		#DIV/0!		#DIV/0!		#DIV/0!						1080	1215	1179	1170	1295						955	222		640
Ouest	2014			#DIV/0!		#DIV/0!		#DIV/0!		#DIV/0!					#DIV/0!		#DIV/0!		#DIV/0!		#DIV/0!						1235	1360	1240	1631	1213						711	189
Ouest	2013	93270	48807	0.523287	44861	0.919151	2261	0.0504001	439	0.194162	494			955	#DIV/0!	711	#DIV/0!	28	0.0393812		0						13	21	21	31	31						28	82
Ouest	2012	111108	44670	0.402041	42245	0.945713	2922	0.0691679	333	0.113963	1290			222	#DIV/0!	189	#DIV/0!	82	0.433862		0						11	16	22	32	16
Ouest	2011			#DIV/0!		#DIV/0!		#DIV/0!		#DIV/0!					#DIV/0!		#DIV/0!		#DIV/0!		#DIV/0!
Ouest	2010	89268	31628	0.354304	30326	0.958834	1625	0.0535844	602	0.370462	99			640	#DIV/0!		#DIV/0!		#DIV/0!		#DIV/0!
Nord-Ouest	2023	66170	36771	0.555705	35784	0.973158	1640	0.0458305	9.37	0.00571341			1130	1111	0.983186	1180	1.04425	23	0.0194915	21	0.913043						66170	65386	64552	74062	77623	76462					95027	91741		90238
Nord-Ouest	2022	65386	41301	0.631649	41080	0.994649	1244	0.0302824	1189	0.955788			1317	1299	0.986333	1105	0.839028	29	0.0262443	26	0.896552						36771	41301	42169	39889	37619	47420					48325	47854		35757
Nord-Ouest	2021	64552	42169	0.653256	42136	0.999217	1318	0.0312797	1285	0.974962	669	639	1290	1265	0.98062	1230	0.953488	28	0.0227642	25	0.892857						35784	41080	42136	39644	36285	47293	48870				48129	47233		34541
Nord-Ouest	2020	74062	39889	0.538589	39644	0.993858	1699	0.0428564	1328	0.781636			1409	1265	0.8978	1669	1.18453	39	0.0233673	39	1						1640	1244	1318	1699	1522	2373	992				2012	2728		2759
Nord-Ouest	2019	77623	37619	0.484637	36285	0.964539	1522	0.0419457	1468	0.96452			1507	1412	0.936961	1629	1.08096	48	0.0294659	46	0.958333						9.37	1189	1285	1328	1468						342	661		3394
Nord-Ouest	2018	76462	47420	0.620177	47293	0.997322	2373	0.0501766		0					#DIV/0!		#DIV/0!		#DIV/0!		#DIV/0!								669								858	1105		768
Nord-Ouest	2017			#DIV/0!	48870	#DIV/0!	992	0.0202988		0					#DIV/0!		#DIV/0!		#DIV/0!		#DIV/0!								639
Nord-Ouest	2016			#DIV/0!		#DIV/0!		#DIV/0!		#DIV/0!					#DIV/0!		#DIV/0!		#DIV/0!		#DIV/0!						1130	1317	1290	1409	1507
Nord-Ouest	2015			#DIV/0!		#DIV/0!		#DIV/0!		#DIV/0!					#DIV/0!		#DIV/0!		#DIV/0!		#DIV/0!						1111	1299	1265	1265	1412						224	299		1639
Nord-Ouest	2014			#DIV/0!		#DIV/0!		#DIV/0!		#DIV/0!					#DIV/0!		#DIV/0!		#DIV/0!		#DIV/0!						1180	1105	1230	1669	1629						2314	1056
Nord-Ouest	2013	95027	48325	0.50854	48129	0.995944	2012	0.0418043	342	0.16998	858			224	#DIV/0!	2314	#DIV/0!	154	0.0665514		0						23	29	28	39	48						154	74
Nord-Ouest	2012	91741	47854	0.521621	47233	0.987023	2728	0.0577562	661	0.242302	1105			299	#DIV/0!	1056	#DIV/0!	74	0.0700758		0						21	26	25	39	46
Nord-Ouest	2011			#DIV/0!		#DIV/0!		#DIV/0!		#DIV/0!					#DIV/0!		#DIV/0!		#DIV/0!		#DIV/0!
Nord-Ouest	2010	90238	35757	0.396252	34541	0.965993	2759	0.0798761	3394	1.23016	768			1639	#DIV/0!		#DIV/0!		#DIV/0!		#DIV/0!
Sud	2023	30537	27044	0.885614	26312	0.972933	865	0.0328747	8.25	0.00953757			664	643	0.968373	763	1.1491	13	0.017038	11	0.846154						30537	29105	28647	25364	25793	25408					36555	35677		34931
Sud	2022	29105	23731	0.815358	23655	0.996797	911	0.0385119	898	0.98573			742	728	0.981132	868	1.16981	28	0.0322581	27	0.964286						27044	23731	21182	20182	18875	20881					15008	17176		9459
Sud	2021	28647	21182	0.739414	21025	0.992588	923	0.0439001	905	0.980498	402	380	661	647	0.97882	683	1.03328	16	0.0234261	16	1						26312	23655	21025	19894	18191	20886	22149				16022	12632		3576
Sud	2020	25364	20182	0.795695	19894	0.98573	868	0.0436312	825	0.950461			689	656	0.952104	636	0.923077	18	0.0283019	14	0.777778						865	911	923	868	886	1204	926				1037	856		632
Sud	2019	25793	18875	0.731788	18191	0.963762	886	0.0487054	855	0.965011			691	637	0.921852	609	0.881331	24	0.0394089	11	0.458333						8.25	898	905	825	855						216	86		438
Sud	2018	25408	20881	0.821828	20886	1.00024	1204	0.0576463		0					#DIV/0!		#DIV/0!		#DIV/0!		#DIV/0!								402								212	160		201
Sud	2017			#DIV/0!	22149	#DIV/0!	926	0.0418078		0					#DIV/0!		#DIV/0!		#DIV/0!		#DIV/0!								380
Sud	2016			#DIV/0!		#DIV/0!		#DIV/0!		#DIV/0!					#DIV/0!		#DIV/0!		#DIV/0!		#DIV/0!						664	742	661	689	691
Sud	2015			#DIV/0!		#DIV/0!		#DIV/0!		#DIV/0!					#DIV/0!		#DIV/0!		#DIV/0!		#DIV/0!						643	728	647	656	637						409	299		218
Sud	2014			#DIV/0!		#DIV/0!		#DIV/0!		#DIV/0!					#DIV/0!		#DIV/0!		#DIV/0!		#DIV/0!						763	868	683	636	609						227	1056
Sud	2013	36555	15008	0.410559	16022	1.06756	1037	0.0647235	216	0.208293	212			409	#DIV/0!	227	#DIV/0!	18	0.0792952		0						13	28	16	18	24						18	74
Sud	2012	35677	17176	0.481431	12632	0.735445	856	0.0677644	86	0.100467	160			299	#DIV/0!	1056	#DIV/0!	74	0.0700758		0						11	27	16	14	11
Sud	2011			#DIV/0!		#DIV/0!		#DIV/0!		#DIV/0!					#DIV/0!		#DIV/0!		#DIV/0!		#DIV/0!
Sud	2010	34931	9459	0.270791	3576	0.378053	632	0.176734	438	0.693038	201			218	#DIV/0!		#DIV/0!		#DIV/0!		#DIV/0!
Sud-Ouest	2023	64785	31782	0.490577	30989	0.975049	1300	0.0419504	7.95	0.00611538			838	755	0.900955	829	0.98926	29	0.0349819	26	0.896552						64785	63515	61831	57743	60439	59152					74072	71354		68892
Sud-Ouest	2022	63515	32975	0.519169	32922	0.998393	1016	0.0308608	918	0.903543			871	807	0.926521	864	0.991963	20	0.0231481	13	0.65						31782	32975	34982	30270	24499	25574					31371	31646		29374
Sud-Ouest	2021	61831	34982	0.565768	34829	0.995626	1222	0.0350857	1083	0.886252	426	413	1033	885	0.856728	919	0.889642	17	0.0184984	9	0.529412						30989	32922	34829	30258	23831	25682	33648				31609	31740		26713
Sud-Ouest	2020	57743	30270	0.524219	30258	0.999604	1405	0.046434	1018	0.724555			1027	805	0.783836	992	0.96592	43	0.0433468	43	1						1300	1016	1222	1405	1422	1384	868				1716	2008		1726
Sud-Ouest	2019	60439	24499	0.405351	23831	0.972734	1422	0.0596702	1015	0.713783			942	903	0.958599	888	0.942675	36	0.0405405	28	0.777778						7.95	918	1083	1018	1015						569	682		2011
Sud-Ouest	2018	59152	25574	0.432344	25682	1.00422	1384	0.0538899		0					#DIV/0!		#DIV/0!		#DIV/0!		#DIV/0!								426								1068	538		432
Sud-Ouest	2017			#DIV/0!	33648	#DIV/0!	868	0.0257965		0					#DIV/0!		#DIV/0!		#DIV/0!		#DIV/0!								413
Sud-Ouest	2016			#DIV/0!		#DIV/0!		#DIV/0!		#DIV/0!					#DIV/0!		#DIV/0!		#DIV/0!		#DIV/0!						838	871	1033	1027	942
Sud-Ouest	2015			#DIV/0!		#DIV/0!		#DIV/0!		#DIV/0!					#DIV/0!		#DIV/0!		#DIV/0!		#DIV/0!						755	807	885	805	903						1502	1394		1260
Sud-Ouest	2014			#DIV/0!		#DIV/0!		#DIV/0!		#DIV/0!					#DIV/0!		#DIV/0!		#DIV/0!		#DIV/0!						829	864	919	992	888						1386	674
Sud-Ouest	2013	74072	31371	0.42352	31609	1.00759	1716	0.0542883	569	0.331585	1068			1502	#DIV/0!	1386	#DIV/0!	98	0.0707071		0						29	20	17	43	36						98	53
Sud-Ouest	2012	71354	31646	0.443507	31740	1.00297	2008	0.063264	682	0.339641	538			1394	#DIV/0!	674	#DIV/0!	53	0.078635		0						26	13	9	43	28
Sud-Ouest	2011			#DIV/0!		#DIV/0!		#DIV/0!		#DIV/0!					#DIV/0!		#DIV/0!		#DIV/0!		#DIV/0!
Sud-Ouest	2010	68892	29374	0.426378	26713	0.90941	1726	0.0646127	2011	1.16512	432			1260	#DIV/0!		#DIV/0!		#DIV/0!		#DIV/0!

## Sheet: BD_initiale
Région	Indicateurs		Années
		2023	2022	2021	2020	2019	2018	2017	2016	2015	2014	2013	2012	2011	2010
Adamaoua	FEC attendues	62535	63106	62907	55182	54267	52803				44434	56599	54025		50456
Adamaoua	FEC recues (CPN+SA)	64785	62884	64444	57148	51987	51991				35823	36960	32619		32154
Adamaoua	FEC testées au VIH	61451	62387	63078	55382	44371	52114	47297			31290	24802	18218		20821
Adamaoua	FEC testées positives au VIH	1385	1310	1525	1408	1225	1717	1474			1309	1478	1041		1294
Adamaoua	FEC mise sous TARV	1352	1307	1498	1393	1217					1387	286	165		803
Adamaoua	FEC ayant effctué la CV			1026								181	149		156
Adamaoua	FEC avec CV supprimée			927
Adamaoua	EE nes FEC VIH+	1022	981	964	963	940
Adamaoua	EE mis sous NVP	1008	953	940	917	935						463	478		316
Adamaoua	EE testes au VIH	1009	947	784	840	805						241	284
Adamaoua	EE testes VIH+	51	56	31	28	22						29	43
Adamaoua	Eemis sous TARV	44	50	24	36	19
Est	FEC attendues	51099	49951	48801	40145	40196	39283					41210	40774		39783
Est	FEC recues (CPN+SA)	59541	66768	66440	57608	51998	49816					27425	18692		7943
Est	FEC testées au VIH (CPN+SA)	58001	64717	63866	54104	45074	49013	50209				24168	15457		6456
Est	FEC testées positives au VIH	1981	1998	2274	2515	2091	2712	7649				1471	2056		608
Est	FEC mise sous TARV	17.36	1805	1932	1843	1566						385	303		490
Est	FEC ayant effctué la CV			971								147	167		79
Est	FEC avec CV supprimée			832
Est	EE nes FEC VIH+	1299	1253	1213	1121	1331
Est	EE mis sous NVP	1209	1146	1124	850	871						641	627		189
Est	EE testes au VIH	927	1060	1024	847	636						332	330
Est	EE testes VIH+	26	52	62	75	38						21	43
Est	Eemis sous TARV	21	42	57	34	16
Centre	FEC attendues	152917	156770	153793	138647	143348	139817					195991	186539		176596
Centre	FEC recues (CPN+SA)	143660	146831	147877	136556	131222	141180					104232	64027		73438
Centre	FEC testées au VIH	135595	140041	140150	126779	122549	137284	124240				87290	57812		69373
Centre	FEC testées positives au VIH	4674	4781	4961	5448	5104	6376	3819				5113	4464		5615
Centre	FEC mise sous TARV	31.77	3728	4270	4053	4581						2227	871		3851
Centre	FEC ayant effctué la CV			4015								1852	1177		962
Centre	FEC avec CV supprimée			3856
Centre	EE nes FEC VIH+	3168	3245	3456	3707	3826
Centre	EE mis sous NVP	2831	2909	3053	3054	3475						3439	409		189
Centre	EE testes au VIH	2845	3463	3274	3521	4558						2248	346
Centre	EE testes VIH+	122	120	140	122	239						158	48
Centre	EE sous TARV	79	77	78	72	103
Extrême-Nord	FEC attendues	250651	243114	236616	231577	218892	212434					190157	183481		173685
Extrême-Nord	FEC recues (CPN+SA)	175606	183473	179214	158838	149500	147163					96724	52412		35292
Extrême-Nord	FEC testées au VIH	167164	174992	160056	121090	92750	124382	113212				46728	26611		14662
Extrême-Nord	FEC testées positives au VIH	1244	1174	1064	1190	1124	1510	5838				1080	684		622
Extrême-Nord	FEC mise sous TARV	8.51	1107	940	993	856						238	92		244
Extrême-Nord	FEC ayant effctué la CV			757								210	479		28
Extrême-Nord	FEC avec CV supprimée			703
Extrême-Nord	EE nes FEC VIH+	656	727	677	651	724
Extrême-Nord	EE mis sous NVP	592	662	553	507	538						518	2112		142
Extrême-Nord	EE testes au VIH	721	644	492	553	394						243	268
Extrême-Nord	EE testes VIH+	39	47	37	17	36						24	37
Extrême-Nord	EE TARV	32	44	31	26	14
Littoral	FEC attendues	119154	116634	114075	101014	102697	100194					158722	151882		143605
Littoral	FEC recues (CPN+SA)	100548	104410	108441	95539	104662	116545					68158	59090		59821
Littoral	FEC testées au VIH	95492	99242	102878	90391	95605	113860	95871				77638	66695		57842
Littoral	FEC testées positives au VIH	3032	2703	3155	3718	4221	4866	2165				3278	3249		4133
Littoral	FEC mise sous TARV	2367	2601	2885	2835	3074						1264	1589		3974
Littoral	FEC ayant effctué la CV			517								1551	1267		1155
Littoral	FEC avec CV supprimée			505
Littoral	EE nes FEC VIH+	2343	2299	2507	2586	3044
Littoral	EE mis sous NVP	2334	2243	2360	2275	2538						2856	870		2026
Littoral	EE testes au VIH	2263	2280	1753	2070	3443						2105	251
Littoral	EE testes VIH+	63	55	59	136	214						78	20
Littoral	EE TARV	57	53	46	60	64
Nord	FEC attendues	145279	140775	136152	133414	129817	125063					115559	92760		102852
Nord	FEC recues (CPN+SA)	108494	116018	42169	116983	101150	97598					80247	58689		56330
Nord	FEC testées au VIH	107250	113619	42136	99751	68421	95909	80825				23233	23744		22294
Nord	FEC testées positives au VIH	1277	1195	1318	1093	1002	1780	1042				638	715		1242
Nord	FEC mise sous TARV	10.54	1145	1285	996	937						155	184		535
Nord	FEC ayant effctué la CV			984								81	173		182
Nord	FEC avec CV supprimée			807
Nord	EE nes FEC VIH+	785	753	722	714	800
Nord	EE mis sous NVP	727	696	627	542	646						219	2212		222
Nord	EE testes au VIH	766	741	761	1018	795						177	2046
Nord	EE testes VIH+	32	47	71	82	36						19	200
Nord	EE TARV	24	34	42	12	14
Ouest	FEC attendues	98139	97071	95798	86648	85983	84988					93270	111108		89268
Ouest	FEC recues (CPN+SA)	77743	74800	79466	72240	65649	63115					48807	44670		31628
Ouest	FEC testées au VIH	76647	74624	78900	71723	63084	62749	62325				44861	42245		30326
Ouest	FEC testées positives au VIH	1298	1254	1394	1508	1571	1649	1103				2261	2922		1625
Ouest	FEC mise sous TARV	10.22	1237	1345	1447	1477						439	333		602
Ouest	FEC ayant effctué la CV			666								494	1290		99
Ouest	FEC avec CV supprimée			644
Ouest	EE nes FEC VIH+	1107	1230	1284	1270	1390
Ouest	EE mis sous NVP	1080	1215	1179	1170	1295						955	222		640
Ouest	EE testes au VIH	1235	1360	1240	1631	1213						711	189
Ouest	EE testes VIH+	13	21	21	31	31						28	82
Ouest	EE TARV	11	16	22	32	16
Nord-Ouest	FEC attendues	66170	65386	64552	74062	77623	76462					95027	91741		90238
Nord-Ouest	FEC recues (CPN+SA)	36771	41301	42169	39889	37619	47420					48325	47854		35757
Nord-Ouest	FEC testées au VIH	35784	41080	42136	39644	36285	47293	48870				48129	47233		34541
Nord-Ouest	FEC testées positives au VIH	1640	1244	1318	1699	1522	2373	992				2012	2728		2759
Nord-Ouest	FEC mise sous TARV	9.37	1189	1285	1328	1468						342	661		3394
Nord-Ouest	FEC ayant effctué la CV			669								858	1105		768
Nord-Ouest	FEC avec CV supprimée			639
Nord-Ouest	EE nes FEC VIH+	1130	1317	1290	1409	1507
Nord-Ouest	EE mis sous NVP	1111	1299	1265	1265	1412						224	299		1639
Nord-Ouest	EE testes au VIH	1180	1105	1230	1669	1629						2314	1056
Nord-Ouest	EE testes VIH+	23	29	28	39	48						154	74
Nord-Ouest	EE TARV	21	26	25	39	46
Sud-Ouest	FEC attendues	64785	63515	61831	57743	60439	59152					74072	71354		68892
Sud-Ouest	FEC recues (CPN+SA)	31782	32975	34982	30270	24499	25574					31371	31646		29374
Sud-Ouest	FEC testées au VIH	30989	32922	34829	30258	23831	25682	33648				31609	31740		26713
Sud-Ouest	FEC testées positives au VIH	1300	1016	1222	1405	1422	1384	868				1716	2008		1726
Sud-Ouest	FEC mise sous TARV	7.95	918	1083	1018	1015						569	682		2011
Sud-Ouest	FEC ayant effctué la CV			426								1068	538		432
Sud-Ouest	FEC avec CV supprimée			413
Sud-Ouest	EE nes FEC VIH+	838	871	1033	1027	942
Sud-Ouest	EE mis sous NVP	755	807	885	805	903						1502	1394		1260
Sud-Ouest	EE testes au VIH	829	864	919	992	888						1386	674
Sud-Ouest	EE testes VIH+	29	20	17	43	36						98	53
Sud-Ouest	EE TARV	26	13	9	43	28
Sud	FEC attendues	30537	29105	28647	25364	25793	25408					36555	35677		34931
Sud	FEC recues (CPN+SA)	27044	23731	21182	20182	18875	20881					15008	17176		9459
Sud	FEC testées au VIH	26312	23655	21025	19894	18191	20886	22149				16022	12632		3576
Sud	FEC testées positives au VIH	865	911	923	868	886	1204	926				1037	856		632
Sud	FEC mise sous TARV	8.25	898	905	825	855						216	86		438
Sud	FEC ayant effctué la CV			402								212	160		201
Sud	FEC avec CV supprimée			380
Sud	EE nes FEC VIH+	664	742	661	689	691
Sud	EE mis sous NVP	643	728	647	656	637						409	299		218
Sud	EE testes au VIH	763	868	683	636	609						227	1056
Sud	EE testes VIH+	13	28	16	18	24						18	74
Sud	EE TARV	11	27	16	14	11
